# Supplementary material
Source: PubMed Central journal article supplement (PMC506813)
Supplement: nar_32_13_4026__1.pdf [file nar_32_13_4026__1.pdf]

Supplemental Table S1a

| DNA positions |    | $K_{ref}(b)$ of Mnt proteins |      |       |       |       |       |        |      |       |       |      |       |
|---------------|----|------------------------------|------|-------|-------|-------|-------|--------|------|-------|-------|------|-------|
| 16            | 17 | Mnt                          | H6   | H6A   | H6G   | H6I   | H6L   | H6M    | H6N  | H6Q   | H6R   | H6T  | H6V   |
| A             | A  | 0.07                         | 0.07 | 3.30  | 3.90  | 49.44 | 7.46  | 5.13   | 1.65 | 5.45  | 1.35  | 4.07 | 9.94  |
|               | C  | 1.00                         | 1.00 | 1.00  | 1.00  | 1.00  | 1.00  | 1.00   | 1.00 | 1.00  | 1.00  | 1.00 | 1.00  |
|               | G  | 0.03                         | 0.13 | 1.88  | 2.52  | 3.18  | 7.58  | 6.98   | 0.95 | 4.37  | 2.09  | 0.65 | 7.40  |
|               | T  | 0.07                         | 0.08 | 0.96  | 1.26  | 0.46  | 2.18  | 2.11   | 0.93 | 1.60  | 0.67  | 0.45 | 0.41  |
| C             | A  | 0.32                         | 0.39 | 15.62 | 10.91 | 10.34 | 6.65  | 6.04   | 1.66 | 9.64  | 33.86 | 4.00 | 7.11  |
|               | C  | 0.59                         | 0.69 | 9.31  | 3.33  | 1.05  | 2.52  | 2.83   | 0.69 | 5.24  | 13.98 | 1.07 | 1.74  |
|               | G  | 0.11                         | 0.08 | 3.06  | 2.32  | 1.58  | 1.13  | 3.52   | 0.50 | 5.46  | 13.61 | 1.46 | 1.73  |
|               | T  | 0.09                         | 0.11 | 1.82  | 4.48  | 0.47  | 1.51  | 2.09   | 0.67 | 13.16 | 16.30 | 2.12 | 0.58  |
| G             | A  | 0.03                         | 0.07 | 1.40  | 2.30  | 3.93  | 16.61 | 5.70   | 0.42 | 2.43  | 3.99  | 1.24 | 0.74  |
|               | C  | 0.13                         | 0.38 | 0.36  | 0.56  | 0.51  | 2.00  | 2.20   | 0.23 | 1.40  | 0.74  | 0.32 | 0.20  |
|               | G  | 0.03                         | 0.03 | 1.13  | 1.88  | 3.10  | 8.45  | 6.56   | 0.66 | 2.76  | 1.14  | 1.49 | 2.89  |
|               | T  | 0.04                         | 0.06 | 0.36  | 1.96  | 0.39  | 3.60  | 1.88   | 0.31 | 0.86  | 0.60  | 1.86 | 0.32  |
| T             | A  | 0.06                         | 0.19 | 23.33 | 35.97 | 29.07 | 52.04 | 101.42 | 1.79 | 34.94 | 24.34 | 6.48 | 11.08 |
|               | C  | 0.38                         | 0.60 | 1.09  | 2.37  | 0.84  | 1.49  | 3.93   | 0.37 | 4.59  | 1.70  | 0.68 | 0.39  |
|               | G  | 0.03                         | 0.04 | 3.05  | 12.88 | 5.21  | 10.50 | 17.45  | 2.09 | 17.67 | 4.42  | 4.78 | 3.02  |
|               | T  | 0.03                         | 0.05 | 0.94  | 3.88  | 0.57  | 3.07  | 3.62   | 0.63 | 4.40  | 0.62  | 0.90 | 0.32  |

Supplemental Table S1b

| DNA positions |    | Standard deviations of $K_{ref}(b)$ |       |       |       |       |       |       |       |       |       |       |       |
|---------------|----|-------------------------------------|-------|-------|-------|-------|-------|-------|-------|-------|-------|-------|-------|
| 16            | 17 | Mnt                                 | H6    | H6A   | H6G   | H6I   | H6L   | H6M   | H6N   | H6Q   | H6R   | H6T   | H6V   |
| A             | A  | 0.01                                | 0.01  | 0.20  | 0.79  | 8.63  | 2.83  | 1.43  | 0.11  | 1.08  | 0.21  | 0.44  | 1.37  |
|               | C  | -----                               | ----- | ----- | ----- | ----- | ----- | ----- | ----- | ----- | ----- | ----- | ----- |
|               | G  | 0.00                                | 0.00  | 0.17  | 0.69  | 0.62  | 4.16  | 1.92  | 0.21  | 1.35  | 0.63  | 0.13  | 0.21  |
|               | T  | 0.01                                | 0.02  | 0.14  | 0.23  | 0.08  | 0.92  | 0.38  | 0.18  | 0.70  | 0.16  | 0.08  | 0.15  |
| C             | A  | 0.02                                | 0.10  | 3.06  | 2.67  | 1.50  | 1.59  | 1.10  | 0.28  | 1.58  | 8.67  | 1.09  | 1.03  |
|               | C  | 0.10                                | 0.19  | 2.42  | 0.97  | 0.25  | 0.90  | 0.35  | 0.18  | 1.42  | 5.24  | 0.21  | 0.66  |
|               | G  | 0.02                                | 0.01  | 0.24  | 0.78  | 0.64  | 0.50  | 0.75  | 0.07  | 1.69  | 4.56  | 0.13  | 0.28  |
|               | T  | 0.03                                | 0.02  | 0.17  | 1.29  | 0.10  | 0.57  | 0.27  | 0.04  | 2.58  | 1.71  | 0.17  | 0.19  |
| G             | A  | 0.00                                | 0.01  | 0.10  | 0.98  | 1.19  | 4.72  | 0.34  | 0.10  | 0.57  | 1.24  | 0.28  | 0.16  |
|               | C  | 0.02                                | 0.18  | 0.04  | 0.11  | 0.09  | 1.00  | 0.36  | 0.01  | 0.41  | 0.26  | 0.04  | 0.05  |
|               | G  | 0.01                                | 0.01  | 0.10  | 0.38  | 0.47  | 4.56  | 1.00  | 0.07  | 0.58  | 0.24  | 0.47  | 0.98  |
|               | T  | 0.01                                | 0.01  | 0.12  | 0.57  | 0.06  | 4.73  | 0.49  | 0.02  | 0.17  | 0.05  | 0.64  | 0.13  |
| T             | A  | 0.01                                | 0.05  | 2.06  | 11.75 | 3.75  | 10.53 | 21.26 | 0.15  | 6.26  | 4.14  | 1.66  | 2.49  |
|               | C  | 0.03                                | 0.11  | 0.12  | 0.75  | 0.10  | 0.50  | 0.33  | 0.05  | 0.71  | 0.31  | 0.04  | 0.05  |
|               | G  | 0.01                                | 0.01  | 0.18  | 3.74  | 1.01  | 3.75  | 1.61  | 0.27  | 4.89  | 3.12  | 0.44  | 0.57  |
|               | T  | 0.00                                | 0.00  | 0.11  | 1.59  | 0.11  | 1.20  | 0.95  | 0.13  | 0.81  | 0.15  | 0.11  | 0.09  |
