# Supplementary material
Source: PubMed Central journal article supplement (PMC506813)
Supplement: nar_32_13_4026__2.pdf [file nar_32_13_4026__2.pdf]

**Supplemental Table 2:** Best independent base probabilities for each Mnt variant

**Mnt**

| Base/Pos: | 16   | 17   |
|-----------|------|------|
| A         | 0.39 | 0.16 |
| C         | 0.37 | 0.70 |
| G         | 0.08 | 0.07 |
| T         | 0.17 | 0.08 |

**H6**

| Base/Pos: | 16   | 17   |
|-----------|------|------|
| A         | 0.32 | 0.18 |
| C         | 0.32 | 0.67 |
| G         | 0.14 | 0.07 |
| T         | 0.22 | 0.08 |

**H6A**

| Base/Pos: | 16   | 17   |
|-----------|------|------|
| A         | 0.10 | 0.64 |
| C         | 0.43 | 0.17 |
| G         | 0.05 | 0.13 |
| T         | 0.41 | 0.06 |

**H6G**

| Base/Pos: | 16   | 17   |
|-----------|------|------|
| A         | 0.09 | 0.64 |
| C         | 0.27 | 0.07 |
| G         | 0.06 | 0.18 |
| T         | 0.58 | 0.11 |

**H6I**

| Base/Pos: | 16   | 17   |
|-----------|------|------|
| A         | 0.49 | 0.83 |
| C         | 0.12 | 0.03 |
| G         | 0.07 | 0.12 |
| T         | 0.32 | 0.02 |

**H6L**

| Base/Pos: | 16   | 17   |
|-----------|------|------|
| A         | 0.14 | 0.65 |
| C         | 0.09 | 0.05 |
| G         | 0.24 | 0.22 |
| T         | 0.53 | 0.08 |

**H6M**

| Base/Pos: | 16   | 17   |
|-----------|------|------|
| A         | 0.09 | 0.69 |
| C         | 0.08 | 0.06 |
| G         | 0.09 | 0.20 |
| T         | 0.73 | 0.06 |

**H6N**

| Base/Pos: | 16   | 17   |
|-----------|------|------|
| A         | 0.31 | 0.38 |
| C         | 0.24 | 0.16 |
| G         | 0.11 | 0.29 |
| T         | 0.34 | 0.17 |

**H6Q**

| Base/Pos: | 16   | 17   |
|-----------|------|------|
| A         | 0.11 | 0.46 |
| C         | 0.29 | 0.11 |
| G         | 0.06 | 0.26 |
| T         | 0.54 | 0.17 |

**H6R**

| Base/Pos: | 16   | 17   |
|-----------|------|------|
| A         | 0.04 | 0.53 |
| C         | 0.65 | 0.14 |
| G         | 0.05 | 0.18 |
| T         | 0.26 | 0.15 |

**H6T**

| Base/Pos: | 16   | 17   |
|-----------|------|------|
| A         | 0.19 | 0.49 |
| C         | 0.26 | 0.09 |
| G         | 0.15 | 0.25 |
| T         | 0.40 | 0.16 |

**H6V**

| Base/Pos: | 16   | 17   |
|-----------|------|------|
| A         | 0.39 | 0.59 |
| C         | 0.23 | 0.07 |
| G         | 0.09 | 0.31 |
| T         | 0.30 | 0.03 |
