# Supplementary material
Source: PubMed Central journal article supplement (PMC506813)
Supplement: nar_32_13_4026__3.pdf [file nar_32_13_4026__3.pdf]

Table S3. Correlation coefficients between the relative affinities for all amino acid: base pair combinations (of those tested in this paper), for each position in the Mnt binding sites (16 and 17, but using the complementary strand) compared to the four positions in the EGR family of zinc finger proteins.

| Mnt pos / ZnF pos | 1     | 2    | 3    | 4     |
|-------------------|-------|------|------|-------|
| 16c               | 0.38  | 0.08 | 0.14 | -0.37 |
| 17c               | -0.22 | 0.74 | 0.28 | 0.15  |
